# Supplementary material for: Sugarcane Pulp Lunch-Boxes Produce More Microparticles in Acidic Foods
Source: Preprints.org preprint supplement (doi:10.20944/preprints202305.0852.v1), 2023-05-11
Supplement: Supplementary file 1 [file supplementary]

# Sugarcane pulp lunch-boxes produce more microparticles in acidic foods

**Yi Hub, Chunru Moc, Zhiwei Wangb, Wenwen Yua, c*, Changying Hub, c***

a State Key Laboratory of Food Science and Technology, Nanchang University, Nanchang 330047, China.

b Packaging Engineering Institute, Jinan University, Zhuhai, Guangdong, 519070, China.

c Department of Food Science & Engineering, Jinan University, Huangpu West Avenue 601, Guangzhou City, 510632, Guangdong, China.

**Supplementary Information**

Prepared for Submission

To *Journal of Science of food and agriculture*

| **Item** | **Description** | **Page** |
| --- | --- | --- |
| **Figure S1** | The leaking phenomenon of lunchbox when contacting with the 95% EtOH food simulant. | S3 |
| **Figure S2** | Infrared spectra of 15 SCP lunchboxes. | S4 |
| **Figure S3** | Frequency distribution curve in various conditions. | S5 |


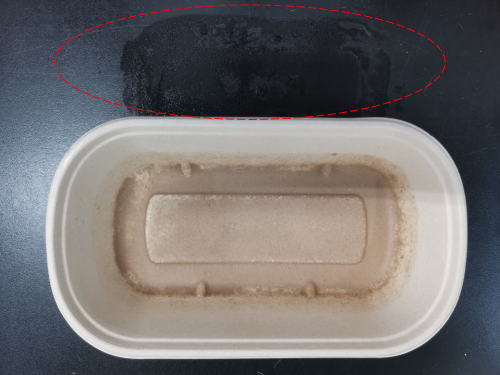


**Figure S1.** The leaking phenomenon of lunchbox when contacting with the 95% EtOH food simulant.


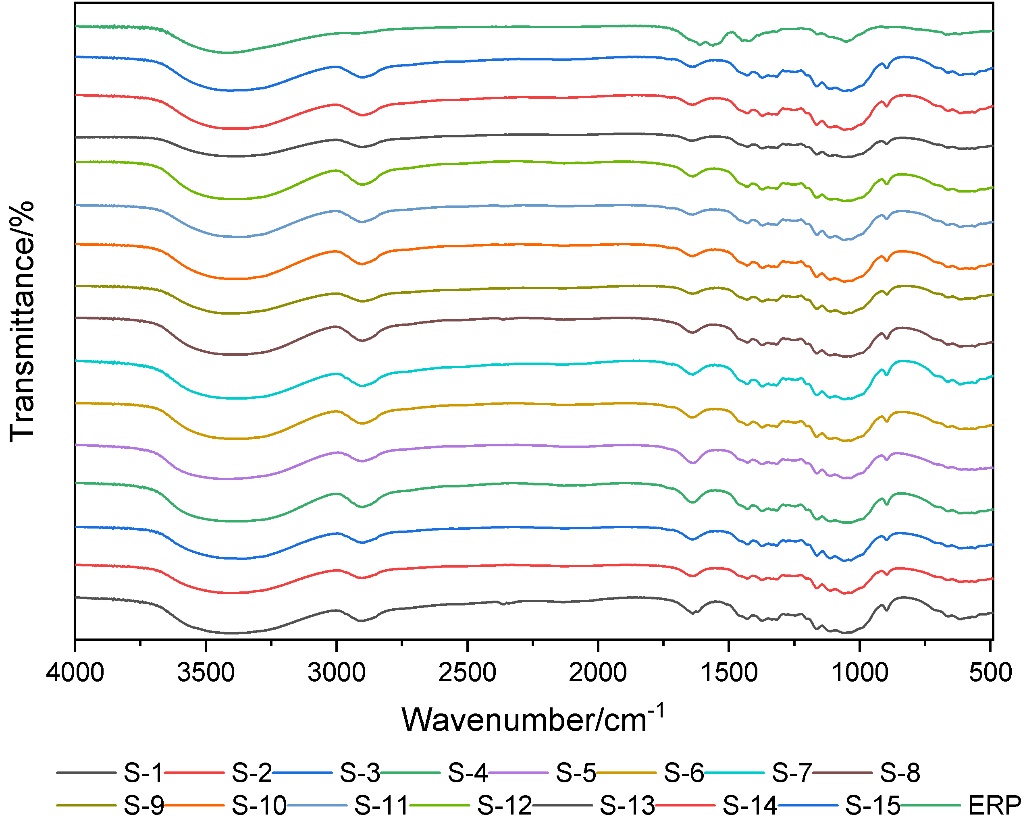


**Figure S2.** Infrared spectra of 15 SCP lunchboxes.
